# Supplementary material for: The Role of Acute Rehabilitation during the COVID-19 Pandemic: A Retrospective Study in the Czech Republic
Source: MDPI journal article supplement (doi:10.3390/life13051212), 2023-05-19
Supplement: s1 [file s1]

## Supplement S1

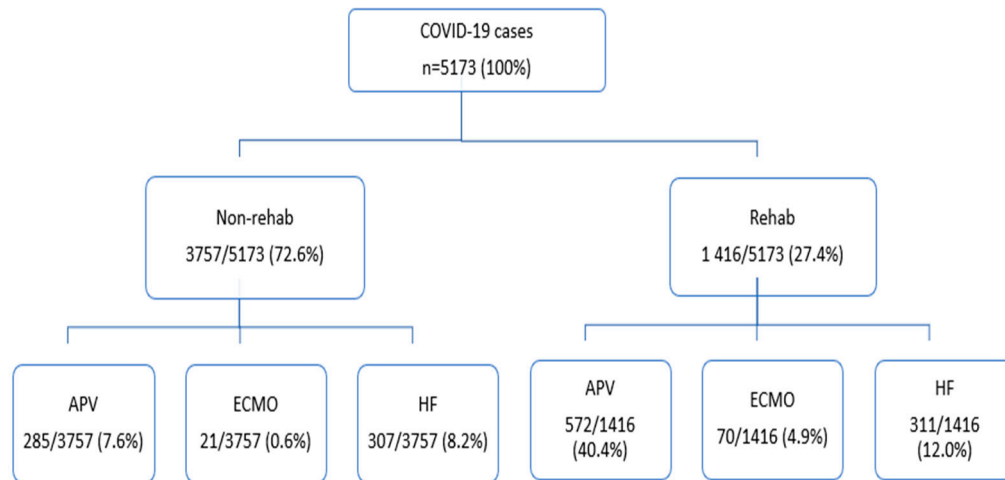

**Figure S1.** Cases in individual groups and categories

|                      | Item No. | Recommendation                                                                                                                  | Page No. | Relevant text from manuscript                                                                              |
|----------------------|----------|---------------------------------------------------------------------------------------------------------------------------------|----------|------------------------------------------------------------------------------------------------------------|
| Title and abstract   | 1        | (a) Indicate the study's design with a commonly used term in the title or the abstract                                          | 1        | The Role of Acute Rehabilitation during the COVID-19 Pandemic: A Retrospective Study in the Czech Republic |
|                      | —        | (b) Provide in the abstract an informative and balanced summary of what was done and what was found                             | 1        |                                                                                                            |
| <b>Introduction</b>  |          |                                                                                                                                 |          |                                                                                                            |
| Background/rationale | 2        | Explain the scientific background and rationale for the investigation being reported                                            | 2-3      |                                                                                                            |
| Objectives           | 3        | State specific objectives, including any prespecified hypotheses                                                                | 3        |                                                                                                            |
| <b>Methods</b>       |          |                                                                                                                                 |          |                                                                                                            |
| Study design         | 4        | Present key elements of study design early in the paper                                                                         | 3-4      | retrospective study                                                                                        |
| Setting              | 5        | Describe the setting, locations, and relevant dates, including periods of recruitment, exposure, follow-up, and data collection | 3-4      | the hospital information system                                                                            |
| Participants         | 6        | Cohort                                                                                                                          | 3-4      | COVID-19 patients 18–99 years of age                                                                       |
|                      | —        | Cases and controls                                                                                                              | 3-4      | rehab group versus non-rehab group                                                                         |

|                           |    |                                                                                                                                                                                      |     |                                                                                                                            |
|---------------------------|----|--------------------------------------------------------------------------------------------------------------------------------------------------------------------------------------|-----|----------------------------------------------------------------------------------------------------------------------------|
| Variables                 | 7  | Clearly define all outcomes, exposures, predictors, potential confounders, and effect modifiers. Give diagnostic criteria, if applicable                                             | 3-4 | Gender, age, BMI, length of hospitalization, termination of hospitalization                                                |
| Data sources/ measurement | 8* | For each variable of interest, give sources of data and details of methods of assessment (measurement). Describe comparability of assessment methods if there is more than one group | 3-4 | Sources - the hospital information system                                                                                  |
| Bias                      | 9  | Describe any efforts to address potential sources of bias                                                                                                                            |     | COVID-19 patients, who were hospitalized in University Hospital Ostrava                                                    |
| Study size                | 10 | Explain how the study size was arrived at                                                                                                                                            | 3-4 | All COVID-19 patients from University Hospital Ostrava during the period March 2020–December 2021.                         |
| Quantitative variables    | 11 | Explain how quantitative variables were handled in the analyses. If applicable, describe which groupings were chosen and why                                                         | 4   | Before statistical testing of quantitative parameters, the normality of the data was verified using the Shapiro-Wilk test. |
| Statistical methods       | 12 | Describe any methods used to examine subgroups and interactions                                                                                                                      | 4   | Non-parametric test                                                                                                        |
|                           |    | Explain how missing data were addressed                                                                                                                                              | 4   | Patients with missing body mass index (BMI) data were excluded from the statistical                                        |

|                  |    |                                                                                                                                                                                                   | analysis for the relevant parameters                                 |
|------------------|----|---------------------------------------------------------------------------------------------------------------------------------------------------------------------------------------------------|----------------------------------------------------------------------|
| Results          |    |                                                                                                                                                                                                   |                                                                      |
| Participants     | 13 | (a) Report numbers of individuals at each stage of study—eg numbers potentially eligible, examined for eligibility, confirmed eligible, included in the study, completing follow-up, and analysed | 4<br>$n = 5173$ , rehab 1416, non-rehab 3757                         |
|                  |    | (b) Give reasons for non-participation at each stage                                                                                                                                              | There are any non-participations                                     |
|                  |    | (c) Consider use of a flow diagram                                                                                                                                                                | Supplement 1                                                         |
| Descriptive data | 14 | (a) Give characteristics of study participants (eg demographic, clinical, social) and information on exposures and potential confounders                                                          | 4<br>3.1. Basic Characteristics of the Study Group                   |
|                  |    | (b) Indicate number of participants with missing data for each variable of interest                                                                                                               | 7<br>Table 2 – missing BMI                                           |
| Outcome data     | 15 | <i>Cohort study</i> —Report numbers of outcome events or summary measures over time                                                                                                               | 4-5<br>3.1. Basic Characteristics of the Study Group, Fig. 1, Fig. 2 |
|                  |    | <i>Case-control study</i> —Report numbers in each exposure                                                                                                                                        | 6<br>Table 1                                                         |

|                   |    |                                                                                                                                                                                                          |      |                                                                                                    |
|-------------------|----|----------------------------------------------------------------------------------------------------------------------------------------------------------------------------------------------------------|------|----------------------------------------------------------------------------------------------------|
|                   |    | category, or summary measures of exposure                                                                                                                                                                |      |                                                                                                    |
| Main results      | 16 | Give unadjusted estimates and, if applicable, confounder-adjusted estimates and their precision (eg, 95% confidence interval). Make clear which confounders were adjusted for and why they were included | 6-8  | 3.3. Evaluation of the Difficulty of Rehabilitation, Tab. 2<br>3.4. Termination of hospitalization |
| Other analyses    | 17 | Report other analyses done—eg analyses of subgroups and interactions, and sensitivity analyses                                                                                                           |      | No                                                                                                 |
| <b>Discussion</b> |    |                                                                                                                                                                                                          |      |                                                                                                    |
| Key results       | 18 | Summarise key results with reference to study objectives                                                                                                                                                 | 8-10 |                                                                                                    |
| Limitations       | 19 | Discuss limitations of the study, taking into account sources of potential bias or imprecision. Discuss both direction and magnitude of any potential bias                                               | 8-10 |                                                                                                    |
| Interpretation    | 20 | Give a cautious overall interpretation of results considering objectives, limitations, multiplicity of analyses, results from similar studies, and other relevant evidence                               | 8-10 |                                                                                                    |

|                          |    |                                                                                                                                                               |      |                                                                                                    |
|--------------------------|----|---------------------------------------------------------------------------------------------------------------------------------------------------------------|------|----------------------------------------------------------------------------------------------------|
| Generalisability         | 21 | Discuss the generalisability (external validity) of the study results                                                                                         | 8-10 |                                                                                                    |
| <b>Other information</b> |    |                                                                                                                                                               |      |                                                                                                    |
| Funding                  | 22 | Give the source of funding and the role of the funders for the present study and, if applicable, for the original study on which the present article is based | 11   | This research was supported by the Ministry of Health of the Czech Republic, grant no. NU22-A-114. |

**Table S1.** STROBE statement - checklist
